# Supplementary material
Source: Frontiers journal article supplement (https://www.frontiersin.org/articles/56712)
Supplement: Data_Sheet_1.PDF [file Data_Sheet_1.PDF]

SUPPLEMENTARY MATERIAL

## **The grit effect: predicting retention in the military, the workplace, school and marriage**

---

Lauren Eskreis-Winkler<sup>1\*</sup>, Elizabeth P. Shulman<sup>1</sup>, Scott A. Beal<sup>2</sup>, Angela Lee Duckworth<sup>1</sup>  
<sup>1</sup>Psychology, University of Pennsylvania, Philadelphia, PA, USA  
<sup>2</sup>Fort Bragg Research Element, U.S. Army Research Institute, VA, USA

Correspondence concerning this article can be addressed to Lauren Eskreis-Winkler, Department of Psychology, University of Pennsylvania, 3701 Market Street, Suite 207, Philadelphia, PA 19104. E-mail: [eskreisl@sas.upenn.edu](mailto:eskreisl@sas.upenn.edu).

Table 1a. Summary Statistics and Intercorrelations among ARSOF Candidates (Study 1).

$N = 677$ .

| s                       | Correlations <sup>a</sup> |        |        |        |
|-------------------------|---------------------------|--------|--------|--------|
| Variables               | 1                         | 2      | 3      | 4      |
| 1. Grit                 |                           |        |        |        |
| 2. General intelligence | -.07                      |        |        |        |
| 3. Physical fitness     | .06                       | .09*   |        |        |
| 4. Age                  | .12**                     | -.05   | -.13** |        |
| 5. Years of schooling   | -.00                      | .42*** | .11**  | .24*** |

*Note.* \* $p < .05$ . \*\* $p < .01$ . \*\*\* $p < .001$ .

<sup>a</sup> Full correlations among demographics are truncated to conserve space. See Appendix A for full details.

Table 2a. Summary Statistics and Intercorrelations for Sales Employees (Study 2).  $N = 442$ .

| Variables                          | Correlations <sup>a</sup> |        |        |        |        |      |
|------------------------------------|---------------------------|--------|--------|--------|--------|------|
|                                    | 1                         | 2      | 3      | 4      | 5      | 6    |
| 1. Grit                            |                           |        |        |        |        |      |
| 2. Big Five extraversion           | .25***                    |        |        |        |        |      |
| 3. Big Five agreeableness          | .39***                    | .26*** |        |        |        |      |
| 4. Big Five conscientiousness      | .64***                    | .37*** | .53*** |        |        |      |
| 5. Big Five emotional stability    | .48***                    | .30*** | .44*** | .53*** |        |      |
| 6. Big Five openness to experience | .19***                    | .34*** | .30*** | .33*** | .31*** |      |
| 7. Female                          | -.02                      | .09    | .11*   | .05    | -.08   | .05  |
| 8. Age                             | .20***                    | .00    | .15**  | .17*** | .21*** | .02  |
| 9. White                           | -.10*                     | .07    | -.01   | -.02   | -.15** | -.09 |
| 10. Black                          | .10*                      | -.06   | .01    | .01    | .12*   | .04  |
| 11. Hispanic                       | -.01                      | -.03   | -.01   | -.02   | .08    | .07  |
| 12. Asian                          | .04                       | -.03   | .02    | .04    | .02    | .04  |
| 13. Other                          | .03                       | -.01   | .02    | .03    | -.01   | .04  |
| 14. Weeks employed                 | .08                       | .03    | -.01   | .06    | -.05   | -.02 |
| 15. Years in sales                 | .15**                     | .08    | .08    | .12*   | .09    | .06  |

Note. \* $p < .05$ . \*\* $p < .01$ . \*\*\*  $p < .001$

Table 2a, continued. Summary Statistics and Intercorrelations for Sales Employees (Study 2).  $N = 442$ .

| Variables                          | Correlations <sup>a</sup> |        |         |      |      |      |        |      |
|------------------------------------|---------------------------|--------|---------|------|------|------|--------|------|
|                                    | 7                         | 8      | 9       | 10   | 11   | 12   | 13     | 14   |
| 1. Grit                            |                           |        |         |      |      |      |        |      |
| 2. Big Five extraversion           |                           |        |         |      |      |      |        |      |
| 3. Big Five agreeableness          |                           |        |         |      |      |      |        |      |
| 4. Big Five conscientiousness      |                           |        |         |      |      |      |        |      |
| 5. Big Five emotional stability    |                           |        |         |      |      |      |        |      |
| 6. Big Five openness to experience |                           |        |         |      |      |      |        |      |
| 7. Female                          |                           |        |         |      |      |      |        |      |
| 8. Age                             | -.08                      |        |         |      |      |      |        |      |
| 9. White                           | .13**                     | .12*   |         |      |      |      |        |      |
| 10. Black                          | -.14**                    | -.05   | -.56*** |      |      |      |        |      |
| 11. Hispanic                       | -.03                      | -.06   | -.49*** | -.08 |      |      |        |      |
| 12. Asian                          | -.07                      | -.04   | -.23*** | -.04 | -.03 |      |        |      |
| 13. Other                          | .03                       | -.07   | -.43*** | -.08 | -.07 | -.02 |        |      |
| 14. Weeks employed                 | -.05                      | .10*   | -.08    | -.04 | .04  | -.09 | .18*** |      |
| 15. Years in sales                 | -.04                      | .51*** | .06     | -.02 | -.00 | .03  | -.05   | -.04 |

Note. \* $p < .05$ . \*\* $p < .01$ . \*\*\*  $p < .001$ .

Table 3a. Summary Statistics and Intercorrelations for Chicago Public School students (Study 3).  $N = 4,813$

| Measures                          | Correlations <sup>a</sup> |         |         |        |         |        |        |         |
|-----------------------------------|---------------------------|---------|---------|--------|---------|--------|--------|---------|
|                                   | 1                         | 2       | 3       | 4      | 5       | 6      | 7      | 8       |
| 1. Grit                           |                           |         |         |        |         |        |        |         |
| 2. Standardized achievement tests | .15***                    |         |         |        |         |        |        |         |
| 3. Academic conscientiousness     | .49***                    | .06***  |         |        |         |        |        |         |
| 4. School motivation              | .49***                    | .12***  | .50***  |        |         |        |        |         |
| 5. Perceived school safety        | .15***                    | .28***  | .13***  | .16*** |         |        |        |         |
| 6. Perceived teacher support      | .38***                    | .12***  | .51***  | .55*** | .26***  |        |        |         |
| 7. Perceived parental support     | .34***                    | .07***  | .29***  | .30*** | .10***  | .27*** |        |         |
| 8. Perceived peer support         | .42***                    | .13***  | .48***  | .53*** | .19***  | .53*** | .27*** |         |
| 9. Female                         | .14***                    | -.01    | .13***  | .14*** | -.08*** | .09*** | .06*** | .15***  |
| 10. Hispanic                      | -.08***                   | .04*    | -.09*** | -.03*  | .02     | .00    | -.05** | -.07*** |
| 11. Black                         | .07***                    | -.20*** | .06***  | .03    | -.11*** | -.03   | .06*** | .06***  |
| 12. White                         | .00                       | .15***  | .02     | -.01   | .10***  | .00    | .02    | -.03    |
| 13. Asian                         | .02                       | .20***  | .05**   | .03*   | .09***  | .06*** | -.05** | .04**   |
| 14. Other                         | .03*                      | .01     | .01     | .01    | .02     | .00    | -.00   | .01     |
| 15. Free lunch                    | -.01                      | -.18*** | -.02    | -.01   | -.07*** | -.03*  | -.03   | -.03    |
| 16. Reduced price lunch           | .00                       | .09***  | .02     | .01    | .03*    | .01    | .01    | .01     |
| 17. Full price lunch              | -.00                      | .15***  | .01     | -.01   | .07***  | .03*   | .02    | .02     |

Note. \* $p < .05$ . \*\* $p < .01$ . \*\*\* $p < .001$ .

Table 3a, continued. Summary Statistics and Intercorrelations for Chicago Public School students (Study 3).  $N = 4,813$ .

| Measures                          | Correlations <sup>a</sup> |         |         |         |         |      |         |         |
|-----------------------------------|---------------------------|---------|---------|---------|---------|------|---------|---------|
|                                   | 9                         | 10      | 11      | 12      | 13      | 14   | 15      | 16      |
| 1. Grit                           |                           |         |         |         |         |      |         |         |
| 2. Standardized achievement tests |                           |         |         |         |         |      |         |         |
| 3. Academic conscientiousness     |                           |         |         |         |         |      |         |         |
| 4. School motivation              |                           |         |         |         |         |      |         |         |
| 5. Perceived school safety        |                           |         |         |         |         |      |         |         |
| 6. Perceived teacher support      |                           |         |         |         |         |      |         |         |
| 7. Perceived parental support     |                           |         |         |         |         |      |         |         |
| 8. Perceived peer support         |                           |         |         |         |         |      |         |         |
| 9. Female                         |                           |         |         |         |         |      |         |         |
| 10. Hispanic                      | -.03                      |         |         |         |         |      |         |         |
| 11. Black                         | .05**                     | -.80*** |         |         |         |      |         |         |
| 12. White                         | -.02                      | -.24*** | -.23*** |         |         |      |         |         |
| 13. Asian                         | -.01                      | -.20*** | -.19*** | -.06*** |         |      |         |         |
| 14. Other                         | .01                       | -.03*   | -.03    | -.01    | -.01    |      |         |         |
| 15. Free lunch                    | .03*                      | .03*    | .09***  | -.18*** | -.06*** | .00  |         |         |
| 16. Reduced price lunch           | -.01                      | .03     | -.07*** | .08***  | .02     | .01  | -.76*** |         |
| 17. Full price lunch              | -.03*                     | -.07*** | -.04**  | .17***  | .07***  | -.01 | -.57*** | -.12*** |

Note. \* $p < .05$ . \*\* $p < .01$ . \*\*\* $p < .001$ .

Table 4a. Summary Statistics and Intercorrelations for Married and Divorced participants (Study 4).  $N = 6,362$ .

| Measures                           | Correlations <sup>a</sup> |        |         |         |         |         |         |
|------------------------------------|---------------------------|--------|---------|---------|---------|---------|---------|
|                                    | 1                         | 2      | 3       | 4       | 5       | 6       | 7       |
| 1. Grit                            |                           |        |         |         |         |         |         |
| 2. Big Five extraversion           | .21***                    |        |         |         |         |         |         |
| 3. Big Five agreeableness          | .20***                    | .21*** |         |         |         |         |         |
| 4. Big Five conscientiousness      | .71***                    | .18*** | .21***  |         |         |         |         |
| 5. Big Five emotional stability    | .33***                    | .30*** | .41***  | .32***  |         |         |         |
| 6. Big Five openness to experience | .08***                    | .24*** | .14***  | .06***  | .11***  |         |         |
| 7. Female                          | -.00                      | .06*** | .11***  | .04**   | -.17*** | .04**   |         |
| 8. Age                             | .12***                    | .06*** | .14***  | .08***  | .10***  | .18***  | .07***  |
| 9. White                           | -.03*                     | .01    | .04**   | .02     | -.02    | .04***  | .05***  |
| 10. Asian                          | .01                       | -.02   | -.05*** | -.02    | .03*    | -.07*** | -.07*** |
| 11. Hispanic                       | .02                       | .00    | -.00    | -.02    | -.01    | .02     | .01     |
| 12. Black                          | .02                       | .02    | .02     | .01     | .03*    | -.00    | -.01    |
| 13. Other                          | .01                       | -.01   | -.02    | -.01    | -.01    | .02     | -.01    |
| 14. Some high school               | -.03*                     | .01    | .01     | -.04**  | .02     | -.02    | -.02    |
| 15. Finished high school           | -.02                      | -.01   | .01     | -.02    | -.02    | -.04*** | .01     |
| 16. Some college                   | -.06***                   | -.00   | .02     | -.06*** | -.03**  | -.04**  | .07***  |
| 17. Associate degree               | -.03*                     | -.02   | .02     | .00     | -.03*   | -.01    | .07***  |
| 18. Bachelor degree                | -.05***                   | -.01   | -.02    | -.05*** | -.00    | -.03**  | -.04**  |
| 19. Post-college degree            | .11***                    | .02    | -.01    | .09***  | -.04**  | .08***  | -.04**  |

Note. \* $p < .05$ . \*\* $p < .01$ . \*\*\* $p < .001$

Table 4a, continued. Summary Statistics and Intercorrelations for Married and Divorced participants (Study 4).  $N = 6,362$ .

Note. \* $p < .05$ . \*\* $p < .01$ . \*\*\*  $p < .001$

|                                    | Correlations |         |         |        |      |      |         |
|------------------------------------|--------------|---------|---------|--------|------|------|---------|
| Measures                           | 8            | 9       | 10      | 11     | 12   | 13   | 14      |
| 1. Grit                            |              |         |         |        |      |      |         |
| 2. Big Five extraversion           |              |         |         |        |      |      |         |
| 3. Big Five agreeableness          |              |         |         |        |      |      |         |
| 4. Big Five conscientiousness      |              |         |         |        |      |      |         |
| 5. Big Five emotional stability    |              |         |         |        |      |      |         |
| 6. Big Five openness to experience |              |         |         |        |      |      |         |
| 7. Female                          |              |         |         |        |      |      |         |
| 8. Age                             |              |         |         |        |      |      |         |
| 9. White                           | .15***       |         |         |        |      |      |         |
| 10. Asian                          | -.13***      | -.55*** |         |        |      |      |         |
| 11. Hispanic                       | -.05***      | -.50*** | -.05**  |        |      |      |         |
| 12. Black                          | -.04**       | -.33*** | -.03*   | -.03*  |      |      |         |
| 13. Other                          | -.05***      | -.49*** | -.04**  | -.04** | -.02 |      |         |
| 14. Some high school               | -.02         | -.02    | .00     | .01    | .02  | .02  |         |
| 15. Finished high school           | -.01         | .01     | -.02    | .00    | -.02 | .02  | -.01    |
| 16. Some college                   | -.02         | .01     | -.05*** | .02    | .01  | .00  | -.03*   |
| 17. Associate degree               | .01          | .03**   | -.04**  | .01    | -.01 | -.02 | -.02    |
| 18. Bachelor degree                | -.09***      | .01     | -.02    | .00    | .01  | .00  | -.06*** |
| 19. Post-college degree            | .09***       | -.03*   | .07***  | -.02   | -.01 | -.01 | -.09*** |



Table 4a, continued. Summary Statistics and Intercorrelations for Married and Divorced participants (Study 4).  $N = 6,362$ .

| Measures                           | Correlations |         |         |         |
|------------------------------------|--------------|---------|---------|---------|
|                                    | 15           | 16      | 17      | 18      |
| 1. Grit                            |              |         |         |         |
| 2. Big Five extraversion           |              |         |         |         |
| 3. Big Five agreeableness          |              |         |         |         |
| 4. Big Five conscientiousness      |              |         |         |         |
| 5. Big Five emotional stability    |              |         |         |         |
| 6. Big Five openness to experience |              |         |         |         |
| 7. Female                          |              |         |         |         |
| 8. Age                             |              |         |         |         |
| 9. White                           |              |         |         |         |
| 10. Asian                          |              |         |         |         |
| 11. Hispanic                       |              |         |         |         |
| 12. Black                          |              |         |         |         |
| 13. Other                          |              |         |         |         |
| 14. Some high school               |              |         |         |         |
| 15. Finished high school           |              |         |         |         |
| 16. Some college                   | -.05***      |         |         |         |
| 17. Associate degree               | -.03*        | -.08*** |         |         |
| 18. Bachelor degree                | -.09***      | -.23*** | -.15*** |         |
| 19. Post-college degree            | -.14***      | -.36*** | -.23*** | -.68*** |

*Note.* \* $p < .05$ . \*\* $p < .01$ . \*\*\*  $p < .001$
